# Supplementary material for: Patterns of care for prostate cancer radiotherapy—results from a survey among German-speaking radiation oncologists
Source: Strahlenther Onkol. 2021 Jan 27;197(11):962–70. doi: 10.1007/s00066-020-01738-1 (PMC8547211; doi:10.1007/s00066-020-01738-1)
Supplement: Supplementary file 1 — Questions of the survey in German [file 66_2020_1738_MOESM1_ESM.pdf]

1. In welcher Einrichtung sind Sie tätig?
  - a. Einzel- oder Gemeinschaftspraxis
  - b. Medizinisches Versorgungszentrum (MVZ)
  - c. Nicht-universitäre Klinik
  - d. Universitätsklinik
2. In welcher Position sind Sie tätig?
  - a. Arzt\*Ärztin in Weiterbildung
  - b. Angestellter\*e Facharzt\*ärztin
  - c. Inhaber\*in
  - d. Medizinisch-technische\*r Radiologieassistent\*in
  - e. Medizinphysik-Experte\*in
  - f. Anderes:
3. In welcher Position sind Sie tätig?
  - a. Assistenzarzt\*ärztin
  - b. Facharzt\*ärztin
  - c. Oberarzt\*ärztin
  - d. Chefarzt\*ärztin
  - e. Medizinisch-technische\*r Radiologieassistent\*in
  - f. Medizinphysik-Experte\*in
  - g. Anderes:
4. Welche Techniken stehen Ihnen zur Verfügung? (Mehrfachauswahl möglich)
  - a. 3D-RT
  - b. IMRT/VMAT
  - c. Helikale IMRT
  - d. IGRT
  - e. Stereotaxie
  - f. Protonen/Schwerionen
  - g. Brachytherapie
  - h. Andere:

**Die folgenden Fragen beziehen sich auf die Planung und Durchführung einer definitiven Radiotherapie bei Patienten mit Prostatakarzinom.**

5. Definitive Radiotherapie: Erfolgt zur Bestrahlungsplanung standardmäßig eine MRT-Untersuchung der Prostata?
  - a. Ja
  - b. Nein
6. Definitive Radiotherapie: Nach welchen Vorgaben wird das Zielvolumen der perkutanen definitiven Radiotherapie in Ihrer Einrichtung konturiert?
  - a. Gemäß European Organization for Research and Treatment of Cancer (EORTC) Konturierungs-Empfehlung

- b. Gemäß European Society for Radiotherapy and Oncology Advisory Committee on Radiation Oncology Practice (ESTRO ACROP) Konturierungs-Empfehlung
  - c. Interne SOP
  - d. Individuell ohne Berücksichtigung der Konturierungs-Empfehlungen
  - e. Andere:
- 7. Definitive Radiotherapie: Mit welcher Dosis wird die Prostata bei einer definitiven Radiotherapie behandelt?
  - a. Gesamtdosis
  - b. Einzeldosis
- 8. Definitive Radiotherapie: Wann werden die Lymphabflusswege in Ihrer Einrichtung mit behandelt (Mehrfachnennung möglich)?
  - a. Aufgrund der PSA Dynamik
  - b. Tumorstadium (cT)
  - c. D'Amico Risikogruppen
  - d. Nach Risikoeinschätzung (Roach Formel, Yale Formel, Partin Tabellen...)
  - e. Bei auffälliger Bildgebung
  - f. Die Lymphabflusswege werden nicht standardmäßig mit behandelt.
  - g. Andere:
- 9. Definitive Radiotherapie: Mit welcher Dosis werden die pelvinen Lymphabflusswege bei einer definitiven Radiotherapie in Ihrer Einrichtung überwiegend behandelt?
  - a. Gesamtdosis
  - b. Einzeldosis
- 10. Definitive Radiotherapie: Wann empfehlen Sie Patienten bei der definitiven Radiotherapie eine zusätzliche Hormontherapie? (Mehrfachauswahl möglich)
  - a. low-risk Patienten nach NCCN
  - b. favourable intermediate-risk Patientennach NCCN
  - c. unfavourable intermediate-risk Patientennach NCCN
  - d. high-risk Patienten nach NCCN
  - e. very high-risk Patienten nach NCCN

**Die folgenden Fragen beziehen sich auf die Planung und Durchführung einer adjuvanten/Salvage-Radiotherapie bei Patienten mit Prostatakarzinom.**

- 11. Postoperative Radiotherapie: Nach welchen Vorgaben wird das Zielvolumen der perkutanen Adjuvanten/Salvage-Radiotherapie in Ihrer Einrichtung konturiert?
  - a. Gemäß Radiation Therapy Oncology Group (RTOG) Konturierungs-Empfehlung
  - b. Gemäß European Organization for Research and Treatment of Cancer (EORTC) Konturierungs-Empfehlung
  - c. Gemäß Australian and New Zealand Radiation Oncology Genito-Urinary Group (FROGG-RANZCR) Konturierungs-Empfehlung
  - d. Gemäß Princess Margaret Hospital (PMH) Konturierungs-Empfehlung
  - e. Interne SOP
  - f. Individuell ohne Berücksichtigung der Konturierungs-Empfehlungen
  - g. Andere:
- 12. Postoperative Radiotherapie: Mit welcher Dosis wird die Prostataloge bei einer perkutanen Adjuvanten/Salvage-Radiotherapie behandelt?

- a. Gesamtdosis
- b. Einzeldosis

13. Postoperative Radiotherapie: Wann werden die pelvinen Lymphabflusswege bei einer perkutanen adjuvanten/Salvage-Radiotherapie in Ihrer Einrichtung mitbehandelt?

(Mehrfachauswahl möglich)

- a. Bei insuffizienter Lymphadenektomie
- b. Auf Basis der postoperativen Tumorklassifikation
- c. Bei auffälliger Bildgebung
- d. Initiale D'Amico Risikogruppen
- e. Nach initialer Risikoeinschätzung (Roach Formel, Yale Formel, Partin Tabellen...)
- f. Die Lymphabflusswege werden nicht standardmäßig mit behandelt.
- g. Andere:

14. Postoperative Radiotherapie: Mit welcher Dosis werden die pelvinen Lymphabflusswege bei einer perkutanen adjuvanten/Salvage-Radiotherapie überwiegend behandelt?

- a. Gesamtdosis
- b. Einzeldosis

15. Wann empfehlen Sie Patienten eine zusätzliche Hormontherapie im Rahmen der Salvage-Radiotherapie?

- a. In der Salvage-Situation erhalten die Patienten keine Hormontherapie
- b. Patienten mit Risikofaktoren (hoher PSA-Wert, Gleason Score, ...) erhalten eine Hormontherapie
- c. Alle Patienten in der Salvage-Situation erhalten eine Hormontherapie

16. Für welchen Zeitraum (in Monaten) empfehlen Sie den Patienten eine zusätzliche Hormontherapie im Rahmen der Salvage-Radiotherapie?

- a. Monatsangabe
